# Supplementary material
Source: publisher figshare collection journal article supplement (https://acs.figshare.com/ndownloader/files/30743736)
Supplement: Supplementary file 1 [file 30743736]

---

## Supporting Information

### **Convenient Tuning of the Elasticity of Self-assembled Nano-sized Triterpenoid to Regulate Their Biological Activities**

Ziying Li<sup>1,2</sup>, Yilin Zheng<sup>1,2</sup>, Huifang Shi<sup>1,2</sup>, Huanzhang Xie<sup>3</sup>, Ya Yang<sup>1,2</sup>,  
Fangyin Zhu<sup>1,2</sup>, Lingjie Ke<sup>1,2</sup>, Haijun Chen<sup>2</sup>, Yu Gao<sup>1,2,\*</sup>

<sup>1</sup>Cancer Metastasis Alert and Prevention Center, College of Chemistry, and

<sup>2</sup>Fujian Provincial Key Laboratory of Cancer Metastasis Chemoprevention and  
Chemotherapy, Fuzhou University, Fuzhou 350108, China.

<sup>3</sup>Institute of Oceanography, Minjiang University, Fuzhou 350108, China.

Corresponding author:

\*Yu Gao, Ph.D, 2 Xueyuan Road, Yangguang Building, 6FL., Fuzhou  
University, Fuzhou, Fujian, China, 350108. Phone and Fax: +86-0591-2286-7183.  
Email: [hellogaoyu@126.com](mailto:hellogaoyu@126.com) or [ygao@fzu.edu.cn](mailto:ygao@fzu.edu.cn)

**Table S1.** Gelation time of different formulations determined by the tube-inversion method.

| Ethanol content | OA concentration (wt%) | State <sup>[a]</sup> | Gel time |
|-----------------|------------------------|----------------------|----------|
| 60%             | 0.025                  | S                    | -        |
|                 | 0.05                   | P                    | -        |
|                 | 0.75                   | P                    | -        |
|                 | 0.1                    | P                    | -        |
|                 | 0.15                   | G                    | 4 min    |
|                 | 0.2                    | G                    | 30 s     |
|                 | 0.3                    | G                    | 18 s     |
|                 | 0.4                    | G                    | instant  |
| 50%             | 0.025                  | S                    | -        |
|                 | 0.05                   | P                    | -        |
|                 | 0.75                   | G                    | 3 min    |
|                 | 0.1                    | G                    | 140 s    |
|                 | 0.15                   | G                    | 83 s     |
|                 | 0.2                    | G                    | 5 s      |
|                 | 0.4                    | G                    | instant  |
| 40%             | 0.025                  | P                    | -        |
|                 | 0.05                   | P                    | -        |
|                 | 0.75                   | G                    | 3 min    |
|                 | 0.1                    | G                    | 3 min    |
|                 | 0.15                   | G                    | 2 min    |
|                 | 0.2                    | G                    | instant  |
| 30%             | 0.025                  | P                    | -        |
|                 | 0.05                   | G                    | 21 min   |
|                 | 0.75                   | G                    | 17 min   |
|                 | 0.1                    | G                    | 12 min   |
|                 | 0.15                   | G                    | 10 min   |
|                 | 0.2                    | G                    | 9 min    |
| 20%             | 0.025                  | P                    | -        |

|     |        |   |         |
|-----|--------|---|---------|
|     | 0.05   | G | 6 days  |
|     | 0.75   | G | 5 days  |
|     | 0.1    | G | 5 days  |
|     | 0.15   | G | 3 days  |
|     | 0.2    | G | 3 days  |
| 15% | 0.025  | P | 12-24 h |
|     | 0.05   | P | 12 h    |
|     | 0.1    | P | 12 h    |
|     | 0.1    | G | 16 days |
| 10% | 0.025  | P | 7 days  |
|     | 0.05   | P | 7 days  |
|     | 0.1    | P | 6 days  |
| 5%  | 0.0125 | P | 14 days |
|     | 0.025  | P | 14 days |
|     | 0.05   | P | 11 days |

<sup>a</sup>S: Solid; P: Partial gel; G: Gel.

---

**Table S2.** Size and PDI of different nanodrugs.

| Ethanol<br>content | OA<br>concentration<br>(wt%) | Diameter (nm) | Polydispersity<br>index (PDI) |
|--------------------|------------------------------|---------------|-------------------------------|
| 15%                | 0.025                        | 288.6±10.0    | 0.40±0.06                     |
|                    | 0.05                         | 283.0±15.6    | 0.53±0.01                     |
|                    | 0.1                          | 305.1±29.3    | 0.48±0.02                     |
| 10%                | 0.025                        | 274.8±4.9     | 0.45±0.04                     |
|                    | 0.05                         | 339.0±11.3    | 0.55±0.12                     |
|                    | 0.1                          | 411.0±9.2     | 0.48±0.05                     |
| 5%                 | 0.025                        | 147.0±2.4     | 0.34±0.04                     |
|                    | 0.05                         | 213.5±6.8     | 0.44±0.08                     |
|                    | 0.1                          | 223.9±5.6     | 0.48±0.06                     |

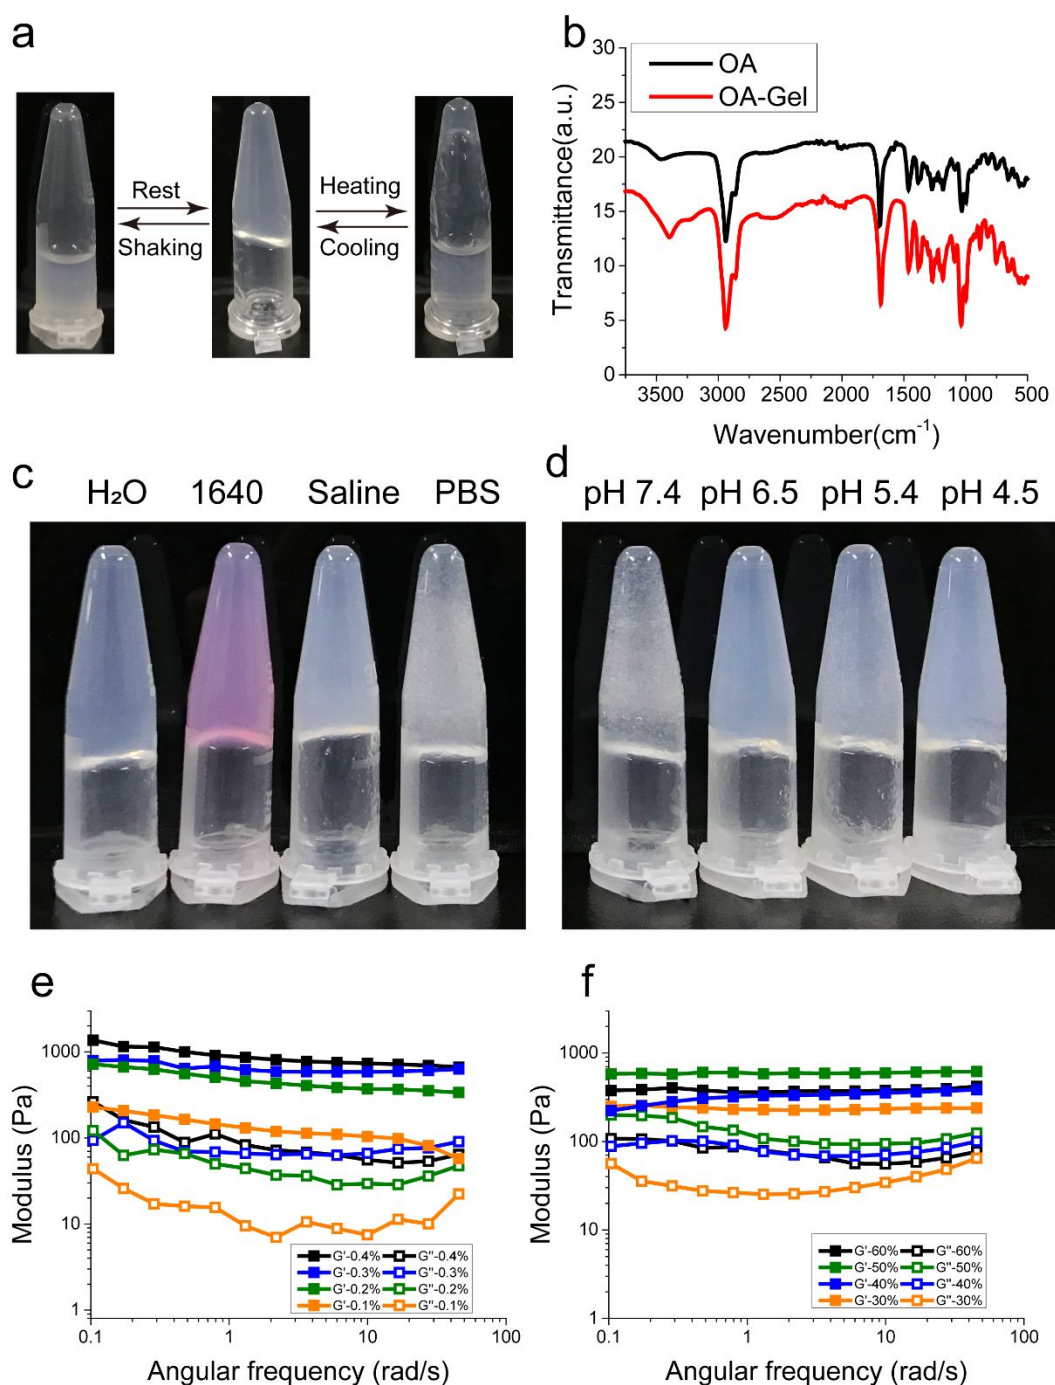

**Figure S1.** Characterization of OA-Gel. (a) Photographs of OA-Gel after different operation. The gel-to-sol transition temperature is 75 °C. (b) FTIR of OA powder and OA-Gel. (c) Photographs of the OA-Gel in different ethanol/water-based medium (ethanol content: 50%). (d) Photographs of OA-Gel in PBS with different pH. (e) Storage and loss moduli of OA-Gel as functions of angular frequency at different OA concentrations. (f) Storage and loss moduli of OA-Gel as functions of angular frequency at different ethanol contents.

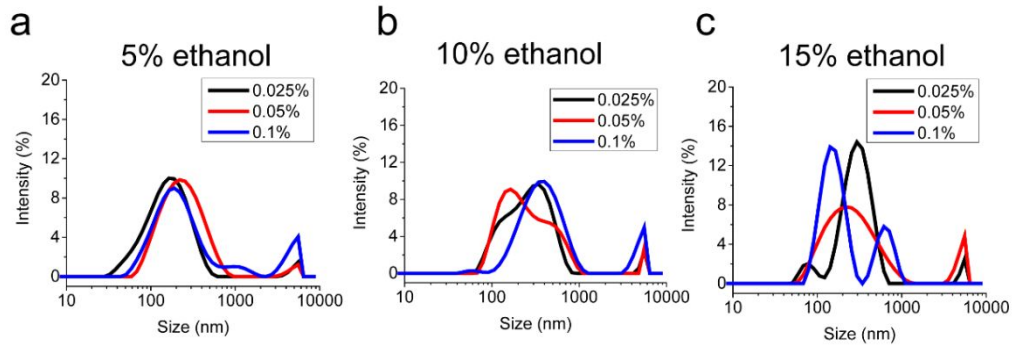

**Figure S2.** Size distributions of different nanodrugs with different ethanol contents.

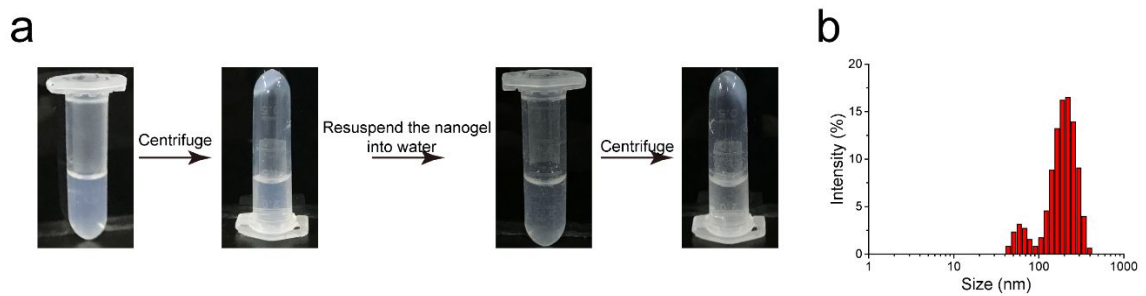

**Figure S3.** (a) Image of OA-NG after dilution. (b) Particle size distribution of OA-NG after dilution.

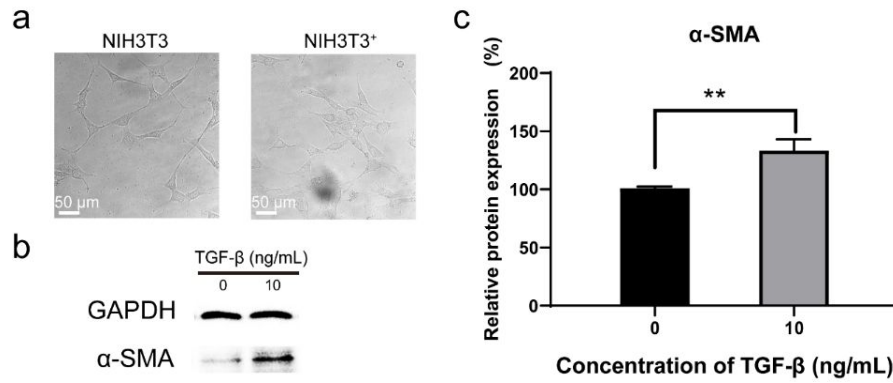

**Figure S4.** (a) The morphology of NIH3T3 and NIH3T3<sup>+</sup> cells. (b) Western blot analysis of  $\alpha$ -SMA in NIH3T3 cells after treatments with different TGF- $\beta$  (10 ng/mL). (c) Relative protein expression of  $\alpha$ -SMA in NIH3T3 cells analysed by Image J. \*\* $p < 0.01$ .

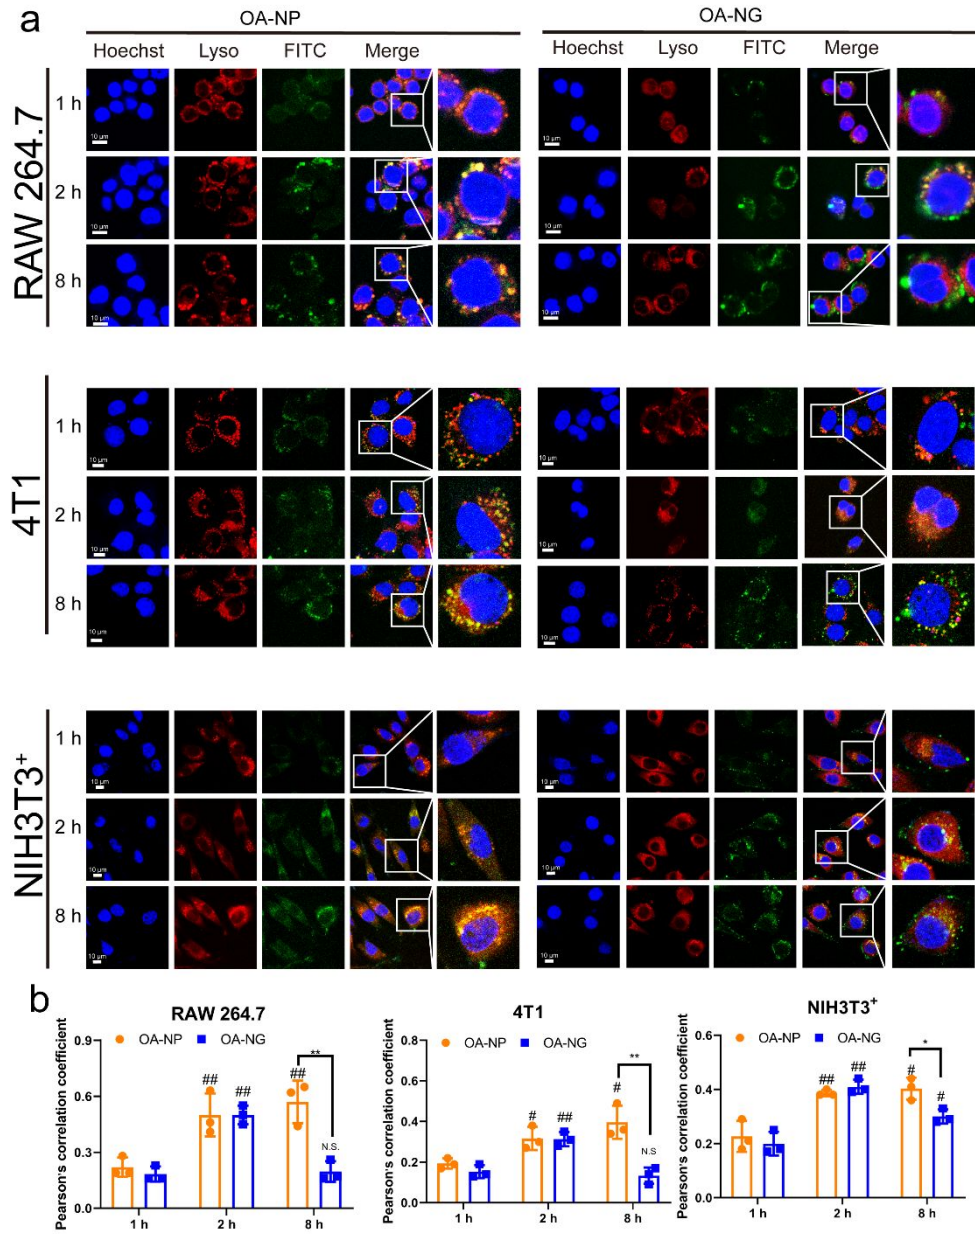

**Figure S5.** (a) Confocal laser scanning microscopic (CLSM) images and co-localization efficiencies (b) of RAW 264.7 cells, 4T1 cells, and NIH3T3<sup>+</sup> cells after incubation with two nanodrugs for different times. Red color originates from LysoTracker Red probe. Green color originates from FITC entrapped in the nanoassemblies. The yellow color indicates co-localization of LysoTracker Red and FITC. N.S. (not significant), # $p < 0.05$ , ## $p < 0.01$  compared with the 1 h group. \* $p < 0.05$ , \*\* $p < 0.01$  compared with the OA-NP group.

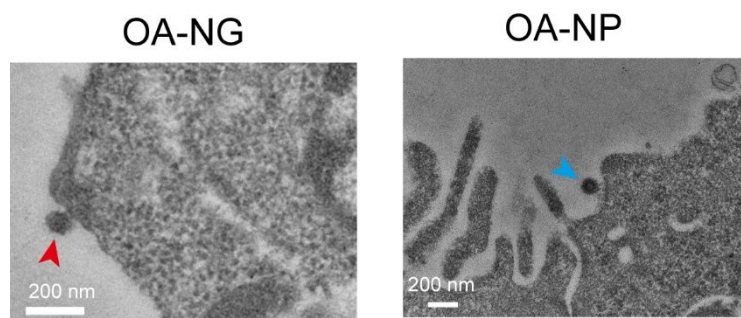

**Figure S6.** The morphology of OA-NG and OA-NP during the interactions with 4T1 cells observed by TEM. Red arrows: OA-NG with deformation. Blue arrows: OA-NP.

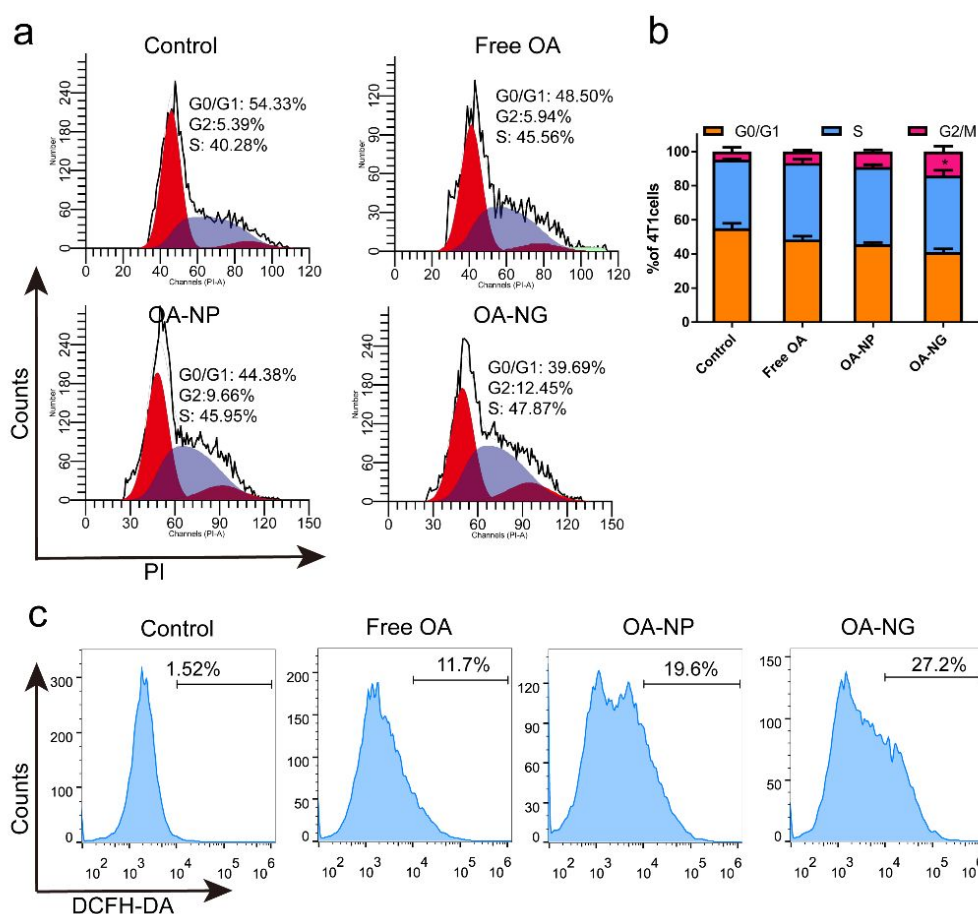

**Figure S7.** Anti-tumor mechanisms of OA nanoassemblies. (a) Flow cytometry analysis of the cell cycle distribution of 4T1 cells after being treated with free OA, OA-NP, and OA-NG for 24 h. (b) The proportions of G0/G1, S, and G2/M phase cells were quantitatively determined and presented. \* $p < 0.05$  compared with the Control group. (c) Flow cytometry analysis of ROS generation in 4T1 cells after the treatment of free OA, OA-NP and OA-NG (50  $\mu\text{g/mL}$  of OA concentration) for 24 h.

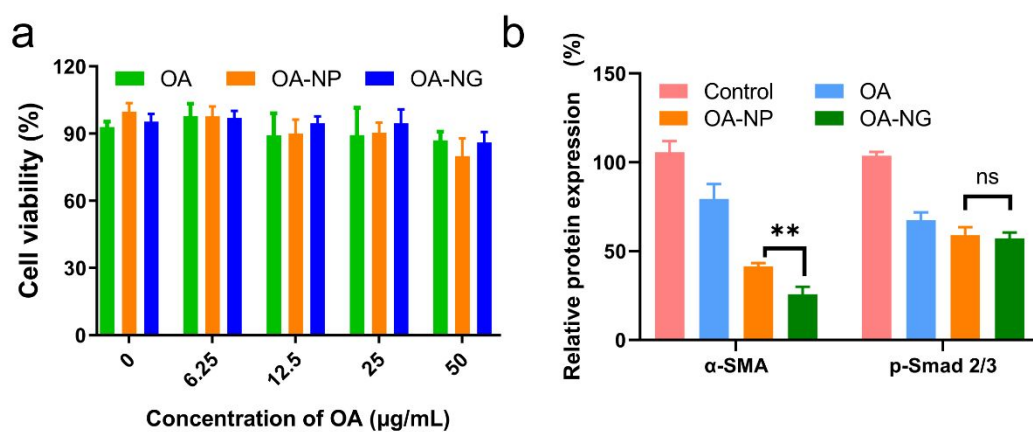

**Figure S8.** (a) *In vitro* cytotoxicity of free OA, OA-NP and OA-NG against NIH3T3<sup>+</sup> cells. (b) Relative protein expression of α-SMA, p-Smad 2/3, and GAPDH in NIH3T3<sup>+</sup> cells after different treatments analyzed by Image J. N.S. (not significant), \*\*p < 0.01 compared with the OA-NP group.

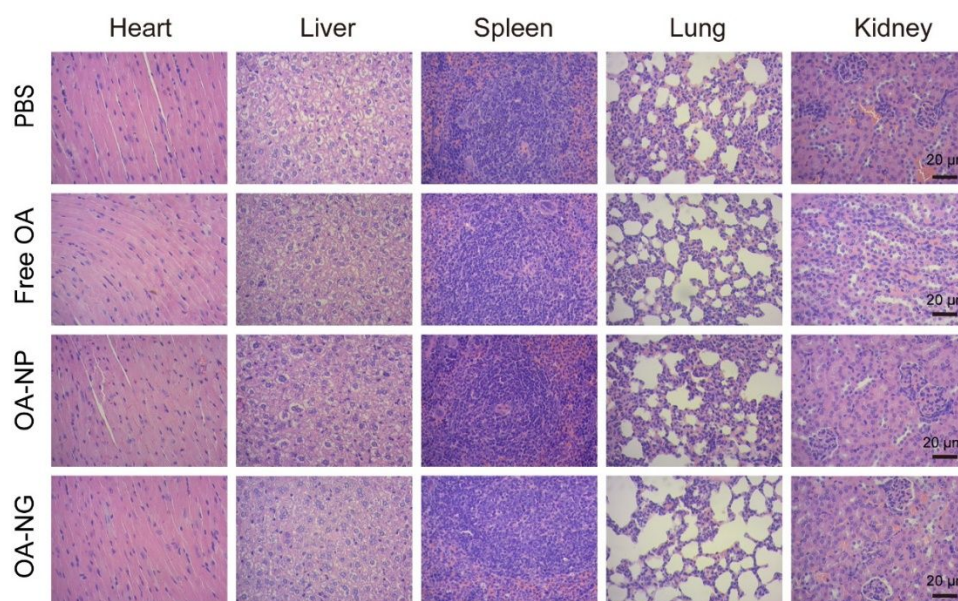

**Figure S9.** Hematoxyline and eosin staining assay of major organs from tumor-bearing mice after various treatments.

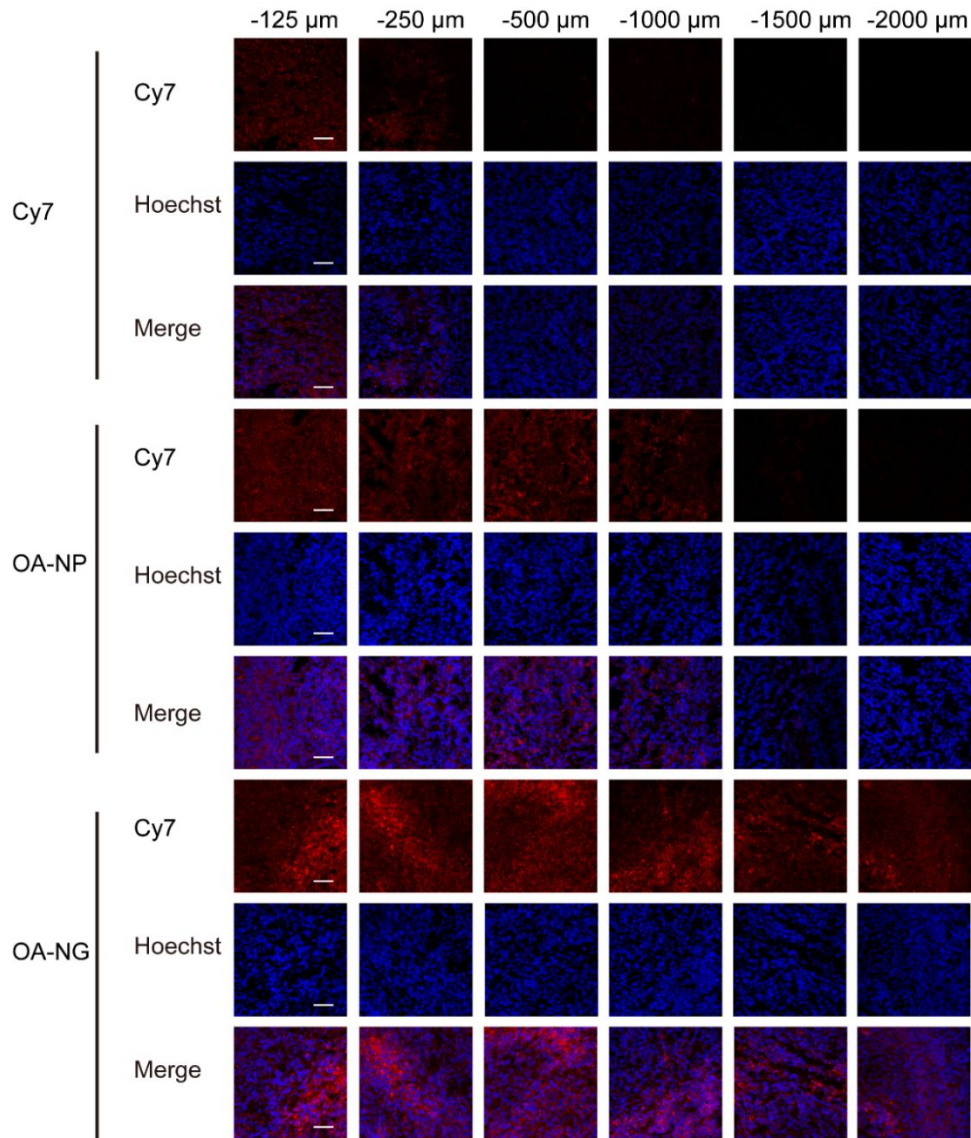

**Figure S10.** *In vivo* tumor penetration of Cy7, OA-NP/Cy7, and OA-NG/Cy7 with equal Cy7 concentration of 0.2 mg/kg at 24 h after intratumorally injection. The scale bars represent 50  $\mu\text{m}$ .

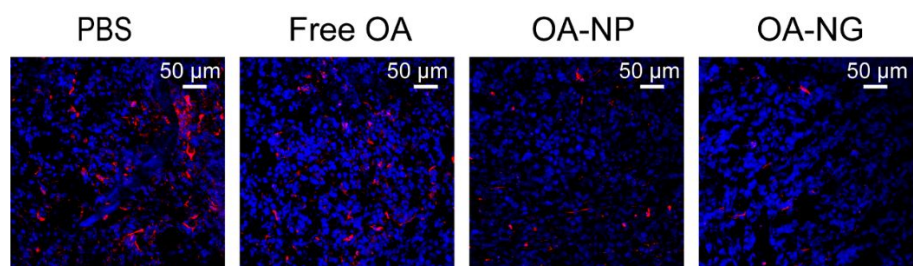

**Figure S11.** Immunofluorescence staining of  $\alpha$ -SMA of tumor sections after treatment for 14 days.
